# Supplementary material for: Self-collection of capillary blood using Tasso-SST devices for Anti-SARS-CoV-2 IgG antibody testing
Source: PLoS One. 2021 Sep 2;16(9):e0255841. doi: 10.1371/journal.pone.0255841 (PMC8412246; doi:10.1371/journal.pone.0255841)
Supplement: S1 Dataset — (XLSX) [file pone.0255841.s001.xlsx]

## Sheet: General Participant Data
Subject ID	Venous Sample OD Ratio	Tasso Supervised Collection Sample (Unstressed) OD Ratio	Tasso Self-Collection Sample (Stressed, Winter) OD Ratio	Tasso Self-Collection Sample (Stressed, Summer) OD Ratio	Date of participation	Age	Gender	Race	Ethnicity	Enrollment group	Date of PCR test	Date of symptoms onset	Date symptoms resolved	Educational Attainment
6094	0.206	0.201		0.188	2020-07-01	62	Female	White	Non-Hispanic or Latino	Control	NA	NA	NA	Advanced degree
12294	0.164	0.157	0.161		2020-07-09	43	Female	White	Non-Hispanic or Latino	Control	NA	NA	NA	Advanced degree
13813	0.145	0.152	0.146		2020-06-30	47	Female	White	Non-Hispanic or Latino	Control	NA	NA	NA	Advanced degree
14246	0.213	0.18	0.176		2020-07-10	60	Male	Black	Non-Hispanic or Latino	Control	NA	NA	NA	Advanced degree
15025	0.21	0.175		0.211	2020-06-22	36	Female	Asian	Non-Hispanic or Latino	Control	NA	NA	NA	Advanced degree
15219	0.116	0.105	0.108		2020-07-10	28	Female	White	Hispanic or Latino	Control	NA	NA	NA	Bachelor's degree
15330	0.154	0.163	0.178		2020-07-10	28	Female	More than one race	Non-Hispanic or Latino	Control	NA	NA	NA	Bachelor's degree
15491	0.216	0.199		0.203	2020-07-01	35	Female	More than one race	Hispanic or Latino	Control	NA	NA	NA	Advanced degree
15575	4.718	4.287	4.703		2020-07-08	43	Female	White	Non-Hispanic or Latino	COVID +	2020-03-12	2020-03-10	2020-03-30	Advanced degree
15687	0.2	0.176		0.199	2020-06-15	25	Female	White	Non-Hispanic or Latino	Control	NA	NA	NA	Bachelor's degree
15730	0.145	0.144		0.157	2020-06-15	33	Male	White	Hispanic or Latino	Control	NA	NA	NA	Advanced degree
15731	7.846	7.818		7.916	2020-06-16	30	Male	Asian	Non-Hispanic or Latino	COVID +	2020-03-27	2020-03-23	2020-04-10	Bachelor's degree
15732	0.274	0.405		0.283	2020-06-16	25	Female	Asian	Non-Hispanic or Latino	Control	NA	NA	NA	Bachelor's degree
15733	6.814	6.759		6.73	2020-06-16	56	Female	White	Non-Hispanic or Latino	COVID +	2020-03-16	2020-03-06	2020-03-23	Advanced degree
15734	5.726	5.614		5.663	2020-06-16	57	Male	White	Non-Hispanic or Latino	COVID +	2020-03-16	2020-03-13	2020-03-28	Associate degree
15735	1.322	1.298		1.184	2020-06-16	32	Female	White	Non-Hispanic or Latino	COVID +	2020-03-27	2020-03-19	2020-04-09	Advanced degree
15736	6.91	7.005		6.903	2020-06-16	32	Male	White	Hispanic or Latino	COVID +	2020-03-23	2020-03-18	2020-04-01	Bachelor's degree
15737	2.437	2.297		2.11	2020-06-18	41	Male	White	Non-Hispanic or Latino	COVID +	2020-04-27	2020-02-14	2020-02-22	Advanced degree
15738	3.094	3.179		2.909	2020-06-18	35	Female	White	Non-Hispanic or Latino	COVID +	2020-04-28	2020-02-17	2020-02-28	Advanced degree
15739	0.391	0.404		0.399	2020-06-18	45	Female	White	Non-Hispanic or Latino	Control	NA	NA	NA	Advanced degree
15740	7.371	7.44		7.589	2020-06-18	64	Female	White	Non-Hispanic or Latino	COVID +	2020-03-20	2020-03-06	2020-04-01	Bachelor's degree
15742	5.812	5.886		5.874	2020-06-18	32	Female	Asian	Non-Hispanic or Latino	COVID +	2020-03-17	2020-03-15	2020-04-06	Bachelor's degree
15743	2.352	2.278		2.301	2020-06-19	47	Female	White	Non-Hispanic or Latino	COVID +	2020-03-13	2020-03-07	2020-03-23	Bachelor's degree
15744	3.33	3.728		3.106	2020-06-19	61	Female	White	Non-Hispanic or Latino	COVID +	2020-03-24	2020-03-22	2020-05-04	Bachelor's degree
15746	3.9	4.321		3.957	2020-06-19	37	Female	White	Non-Hispanic or Latino	COVID +	2020-02-28	2020-02-25	2020-03-01	Bachelor's degree
15747	0.593	0.574		0.604	2020-06-22	22	Female	White	Non-Hispanic or Latino	COVID +	2020-03-02	2020-02-28	2020-03-23	some college
15748	2.19	2.144		2.069	2020-06-22	65	Female	White	Non-Hispanic or Latino	COVID +	2020-04-21	2020-04-19	2020-04-26	Bachelor's degree
15749	1.523	1.458		1.595	2020-06-22	49	Male	White	Non-Hispanic or Latino	COVID +	Blank*	2020-03-24	2020-03-27	Advanced degree
15750	0.195	0.319		0.186	2020-06-22	57	Male	White	Non-Hispanic or Latino	COVID +	2020-04-22	2020-04-13	2020-05-14	Associate degree
15751	9.965	10.127		10	2020-06-22	58	Female	White	Non-Hispanic or Latino	COVID +	2020-03-29	2020-03-28	2020-04-20	Advanced degree
15752	0.12	0.208	0.113		2020-06-30	24	Female	Asian	Non-Hispanic or Latino	Control	NA	NA	NA	Bachelor's degree
15753	1.209	1.256		1.171	2020-06-23	63	Female	White	Non-Hispanic or Latino	COVID +	2020-04-03	2020-03-20	2020-04-10	Associate degree
15754	5.397	5.139		4.887	2020-06-23	63	Male	White	Non-Hispanic or Latino	COVID +	2020-04-03	2020-03-18	2020-04-01	Advanced degree
15755	2.296	2.398		2.431	2020-06-23	43	Female	White	Non-Hispanic or Latino	COVID +	2020-03-09	2020-03-05	2020-03-28	Bachelor's degree
15756	9.844	9.499		9.515	2020-06-23	54	Male	White	Non-Hispanic or Latino	COVID +	2020-03-11	2020-03-10	2020-04-25	Advanced degree
15757	10.093	10.801		10.134	2020-06-23	70	Female	White	Non-Hispanic or Latino	COVID +	2020-03-29	2020-03-25	2020-04-09	Technical school/trade school
15758	10.237	9.887		10.007	2020-06-23	63	Female	White	Non-Hispanic or Latino	COVID +	2020-03-06	2020-02-29	2020-03-20	Advanced degree
15760	10.028	10.592		10.467	2020-06-25	38	Female	Other	Hispanic or Latino	COVID +	2020-04-06	2020-04-05	2020-05-08	Associate degree
15761	7.48	7.419		6.936	2020-06-25	47	Male	Asian	Non-Hispanic or Latino	COVID +	2020-03-25	2020-03-18	2020-04-02	some college
15762	7.659	7.772		7.819	2020-06-25	67	Female	White	Non-Hispanic or Latino	COVID +	2020-03-16	2020-03-10	2020-04-05	Bachelor's degree
15769	0.761	0.758	0.799		2020-06-26	26	Female	White	Non-Hispanic or Latino	COVID +	2020-03-17	2020-03-15	2020-03-25	Advanced degree
15771	4.451	4.368	4.983		2020-06-26	50	Female	White	Non-Hispanic or Latino	COVID +	2020-03-30	2020-03-13	2020-04-03	Bachelor's degree
15772	4.514	4.369	4.22		2020-06-29	50	Female	White	Non-Hispanic or Latino	COVID +	2020-03-25	2020-03-17	2020-04-25	Advanced degree
15773	5.831	5.805	5.736		2020-06-29	36	Female	Asian	Non-Hispanic or Latino	COVID +	2020-03-31	2020-03-28	2020-04-12	Advanced degree
15774	4.14	3.67	3.77		2020-06-29	29	Female	White	Non-Hispanic or Latino	COVID +	2020-03-16	2020-03-13	2020-03-28	Advanced degree
15776	0.158	0.181	0.178		2020-06-29	25	Female	White	Non-Hispanic or Latino	Control	NA	NA	NA	Bachelor's degree
15779	7.591	7.903	7.555		2020-06-29	65	Male	White	Non-Hispanic or Latino	COVID +	2020-03-31	2020-03-26	2020-04-20	Bachelor's degree
15782	5.06	4.875	5.077		2020-06-30	62	Female	White	Non-Hispanic or Latino	COVID +	2020-03-18	2020-03-08	2020-04-05	Bachelor's degree
15784	9.645	9.511	9.645		2020-06-30	58	Female	White	Non-Hispanic or Latino	COVID +	2020-03-15	2020-03-04	2020-03-26	Advanced degree
15785	5.759	5.769	5.62		2020-06-30	61	Male	White	Non-Hispanic or Latino	COVID +	2020-03-31	2020-03-24	2020-04-10	Advanced degree
15786	7.99	8.155		7.821	2020-07-01	68	Male	White	Non-Hispanic or Latino	COVID +	2020-03-25	2020-03-22	2020-04-05	Bachelor's degree
15787	0.755	0.706	0.727		2020-07-02	33	Female	White	Non-Hispanic or Latino	COVID +	2020-04-24	2020-04-25	2020-05-02	Advanced degree
15788	1.345	1.342	1.355		2020-07-02	67	Male	White	Non-Hispanic or Latino	COVID +	2020-03-13	2020-03-12	2020-03-18	Bachelor's degree
15789	6.29	6.377	6.254		2020-07-02	45	Female	White	Non-Hispanic or Latino	COVID +	2020-03-25	2020-03-16	2020-04-04	Advanced degree
15795	0.129	0.126		0.127	2020-07-06	37	Female	Asian	Non-Hispanic or Latino	Control	NA	NA	NA	some college
15796	3.424	3.2	3.821		2020-07-06	57	Female	White	Non-Hispanic or Latino	COVID +	2020-03-25	2020-03-22	2020-03-31	Advanced degree
15798	2.063	1.897	2.065		2020-07-06	44	Male	White	Non-Hispanic or Latino	COVID +	2020-03-14	2020-03-02	2020-04-21	Technical school/trade school
15801	0.304	0.289		0.274	2020-07-07	25	Male	Asian	Non-Hispanic or Latino	Control	NA	NA	NA	Bachelor's degree
15802	4.057	4.203	4.321		2020-07-07	37	Female	More than one race	Non-Hispanic or Latino	COVID +	2020-03-28	2020-03-27	2020-04-10	Advanced degree
15804	0.229	0.165		0.301	2020-07-07	37	Female	White	Non-Hispanic or Latino	Control	NA	NA	NA	Advanced degree
15805	0.1	0.1		0.088	2020-07-07	62	Female	White	Non-Hispanic or Latino	Control	NA	NA	NA	Advanced degree
15806	0.097	0.095		0.072	2020-07-07	69	Male	White	Non-Hispanic or Latino	Control	NA	NA	NA	Bachelor's degree
15809	0.272	0.306		0.309	2020-07-09	44	Female	White	Non-Hispanic or Latino	Control	NA	NA	NA	Advanced degree
15811	4.059	2.274	2.191		2020-07-09	39	Female	White	Non-Hispanic or Latino	COVID +	2020-04-13	2020-04-11	2020-05-02	Advanced degree
15812	0.432	0.513	0.441		2020-07-09	55	Female	White	Non-Hispanic or Latino	COVID +	2020-04-20	2020-04-19	2020-04-28	Bachelor's degree
15813	3.427	3.254	3.261		2020-07-09	35	Male	White	Non-Hispanic or Latino	COVID +	2020-03-20	2020-03-16	2020-03-23	Bachelor's degree
15814	0.182	0.19		0.13	2020-07-09	40	Female	Asian	Non-Hispanic or Latino	Control	NA	NA	NA	Technical school/trade school
15815	0.218	0.188		0.182	2020-07-09	64	Male	Asian	Non-Hispanic or Latino	Control	NA	NA	NA	Advanced degree
15816	0.217	0.235		0.297	2020-07-09	57	Female	White	Non-Hispanic or Latino	Control	NA	NA	NA	Bachelor's degree
15817	0.178	0.149	0.171		2020-07-09	41	Female	Black	Non-Hispanic or Latino	Control	NA	NA	NA	Associate degree
15818	0.208	0.177		0.224	2020-07-09	47	Male	White	Non-Hispanic or Latino	Control	NA	NA	NA	Advanced degree
15819	0.146	0.173	0.159		2020-07-09	27	Female	White	Non-Hispanic or Latino	Control	NA	NA	NA	Advanced degree
15820	0.313	0.389	0.384		2020-07-10	44	Female	White	Non-Hispanic or Latino	COVID +	2020-03-27	2020-03-17	2020-04-23	Bachelor's degree
15821	0.802	0.673	0.699		2020-07-10	56	Male	White	Non-Hispanic or Latino	COVID +	2020-03-04	2020-02-27	2020-03-14	Associate degree
15822	0.129	0.124	0.118		2020-07-10	32	Male	White	Hispanic or Latino	Control	NA	NA	NA	Associate degree
15823	0.223	0.196	0.176		2020-07-13	37	Female	White	Non-Hispanic or Latino	Control	NA	NA	NA	Advanced degree
15824	0.103	0.138	0.118		2020-07-13	69	Female	Black	Non-Hispanic or Latino	Control	NA	NA	NA	Bachelor's degree
15825	0.184	0.303	0.25		2020-07-13	28	Male	Native American	Hispanic or Latino	Control	NA	NA	NA	Bachelor's degree
15826	0.096	0.083	0.076		2020-07-14	26	Male	White	Non-Hispanic or Latino	Control	NA	NA	NA	Bachelor's degree
15827	4.041	3.944	3.89		2020-07-14	52	Female	White	Non-Hispanic or Latino	COVID +	2020-03-13	2020-03-11	2020-03-23	Bachelor's degree
15829	0.102	0.102	0.097		2020-07-14	53	Male	White	Non-Hispanic or Latino	Control	NA	NA	NA	Bachelor's degree
15830	0.123	0.07	0.071		2020-07-14	58	Male	Black	Non-Hispanic or Latino	Control	NA	NA	NA	Bachelor's degree
15832	2.435	2.426	2.444		2020-07-15	52	Female	Black	Non-Hispanic or Latino	COVID +	2020-03-30	2020-03-22	2020-06-14	Bachelor's degree
15833	7.069	6.936	6.878		2020-07-16	50	Male	White	Non-Hispanic or Latino	COVID +	2020-03-18	2020-03-09	2020-03-27	Bachelor's degree
15835	0.048	0.092	0.073		2020-07-16	25	Female	White	Non-Hispanic or Latino	COVID +	2020-06-10	2020-06-06	2020-06-11	Bachelor's degree
15836	5.672	5.611	5.493		2020-07-16	73	Male	White	Non-Hispanic or Latino	COVID +	2020-03-14	2020-03-13	2020-04-03	Advanced degree
15837	2.204	2.146	2.184		2020-07-16	72	Female	White	Non-Hispanic or Latino	COVID +	2020-03-14	2020-03-13	2020-03-27	Advanced degree
15838	4.392	4.391	4.31		2020-07-17	21	Female	White	Non-Hispanic or Latino	COVID +	2020-06-09	2020-06-09	2020-06-17	some college
15839	6.183	5.92	6.156		2020-07-17	57	Male	White	Non-Hispanic or Latino	COVID +	2020-03-26	2020-03-23	2020-04-04	Technical school/trade school
